# Supplementary material for: Genome-Wide Mapping of Cytosine Methylation Revealed Dynamic DNA Methylation Patterns Associated with Sporophyte Development of Saccharina japonica
Source: MDPI journal article supplement (doi:10.3390/ijms22189877), 2021-09-13
Supplement: s1 [file s1]

**Table S1.** Summary of numbers of kelp genome-wide covered cytosines and methylated cytosines.

| Sample | Covered cytosines (millions) |                         |                  |                   | Total number<br>of mCs (%) ) |
|--------|------------------------------|-------------------------|------------------|-------------------|------------------------------|
|        | Total number<br>of cytosines | Three context types (%) |                  |                   |                              |
|        |                              | CG                      | CHG              | CHH               |                              |
| B1     | 213.70                       | 52.87<br>(24.74)        | 41.01<br>(19.19) | 119.82<br>(56.07) | 7.25<br>(3.39)               |
| B2     | 212.62                       | 52.67<br>(24.77)        | 40.82<br>(19.20) | 119.13<br>(56.03) | 8.56<br>(4.03)               |
| B3     | 227.03                       | 56.31<br>(24.81)        | 43.57<br>(19.19) | 127.14<br>(56.00) | 10.46<br>(4.61)              |
| B-Ave  | 217.78                       | 53.95<br>(24.77)        | 41.80<br>(19.19) | 122.03<br>(56.04) | 8.76<br>(4.01)               |
| H1     | 197.84                       | 49.15<br>(24.85)        | 38.02<br>(19.22) | 110.66<br>(55.93) | 11.01<br>(5.57)              |
| H2     | 228.93                       | 56.70<br>(24.77)        | 43.90<br>(19.17) | 128.34<br>(56.06) | 12.64<br>(5.52)              |
| H3     | 182.13                       | 45.31<br>(24.87)        | 35.05<br>(19.25) | 101.77<br>(55.88) | 8.92<br>(4.90)               |
| H-Ave  | 202.97                       | 50.39<br>(24.83)        | 38.99<br>(19.21) | 113.59<br>(55.96) | 10.86<br>(5.33)              |
| S1     | 223.71                       | 55.43<br>(24.78)        | 42.91<br>(19.18) | 125.37<br>(56.04) | 9.26<br>(4.14)               |
| S2     | 217.99                       | 54.07<br>(24.80)        | 41.84<br>(19.19) | 122.09<br>(56.01) | 8.21<br>(3.77)               |
| S3     | 201.84                       | 50.01<br>(24.77)        | 38.76<br>(19.21) | 113.07<br>(56.02) | 8.83<br>(4.37)               |
| S-Ave  | 214.51                       | 53.17<br>(24.78)        | 41.17<br>(19.19) | 120.18<br>(56.02) | 8.77<br>(4.09)               |

CG, CHG and CHH represent three different cytosine contexts, in which the H represents the A, C or T base. B, H and S are the samples of blade, holdfast and stipe, respectively. Ave represent the mean values.

**Table S2.** Identification of the DNA methylation modification pattern of alginate synthesis related genes.

| GeneID     | Symbol | Type       | E-value   | Identity        | Score | Description                            |
|------------|--------|------------|-----------|-----------------|-------|----------------------------------------|
| EVM0006457 | MPI    | CG/CHG/CHH | 5.45E-93  | 135/177(76.27)  | 279   | Mannose-6-phosphate isomerase          |
| EVM0002842 | PMM    | CG/CHG/CHH | 5.50E-93  | 140/141(99.29)  | 296   | Phosphomannose isomerase               |
| EVM0011328 | PMM    | CG/CHG/CHH | 9.61E-152 | 238/317(75.08)  | 443   | Phosphomannose isomerase               |
| EVM0004835 | PMM    | CG/CHG/CHH | 2.52E-173 | 251/252(99.60)  | 520   | Phosphomannomutase                     |
| EVM0000729 | PMM    | CG/CHG/CHH | 0         | 295/333(88.59)  | 588   | Phosphomannomutase                     |
| EVM0013214 | GMD    | CG/CHG/CHH | 0         | 320/320(100.00) | 662   | GDP-mannose 6-dehydrogenase            |
| EVM0002603 | GMD    | CG/CHG/CHH | 0         | 315/315(100.00) | 650   | GDP-mannose 6-dehydrogenase            |
| EVM0001282 | GMD    | CG/CHG/CHH | 0         | 295/314(93.95)  | 617   | GDP-mannose 6-dehydrogenase            |
| EVM0003696 | GT2    | CG/CHG/CHH | 0         | 448/484(92.56)  | 930   | Beta-1,3-glucan synthases (family GT2) |
| EVM0013289 | MC5E   | CG/CHG/CHH | 1.98E-75  | 134/198(67.68)  | 285   | Mannuronan C-5-epimerase               |
| EVM0008148 | MC5E   | CG/CHG/CHH | 0         | 393/497(79.07)  | 793   | Mannuronan C-5-epimerase               |
| EVM0015347 | MC5E   | CG/CHG/CHH | 0         | 289/368(78.53)  | 588   | Mannuronan C-5-epimerase               |
| EVM0007897 | MC5E   | CG/CHG/CHH | 3.38E-128 | 251/336(74.70)  | 426   | Mannuronan C-5-epimerase               |

|            |      |            |           |                |     |                          |
|------------|------|------------|-----------|----------------|-----|--------------------------|
| EVM0010155 | MC5E | CG/CHG/CHH | 6.73E-147 | 227/293(77.47) | 428 | Mannuronan C-5-epimerase |
| EVM0004550 | MC5E | CG/CHG/CHH | 0         | 361/695(51.94) | 632 | Mannuronan C-5-epimerase |
| EVM0005046 | MC5E | CG/CHG/CHH | 0         | 330/499(66.13) | 676 | Mannuronan C-5-epimerase |
| EVM0006204 | MC5E | CG/CHG/CHH | 1.12E-101 | 194/372(52.15) | 322 | Mannuronan C-5-epimerase |
| EVM0006486 | MC5E | CG/CHG/CHH | 2.04E-31  | 98/236(41.53)  | 134 | Mannuronan C-5-epimerase |
| EVM0007118 | MC5E | CG/CHG/CHH | 1.12E-11  | 62/182(34.07)  | 73  | Mannuronan C-5-epimerase |
| EVM0007518 | MC5E | CG/CHG/CHH | 0         | 361/500(72.20) | 746 | Mannuronan C-5-epimerase |
| EVM0008149 | MC5E | CG/CHG/CHH | 0         | 293/459(63.83) | 572 | Mannuronan C-5-epimerase |
| EVM0008551 | MC5E | CG/CHG/CHH | 0         | 356/465(76.56) | 706 | Mannuronan C-5-epimerase |
| EVM0009501 | MC5E | CG/CHG/CHH | 3.44E-94  | 170/320(53.12) | 299 | Mannuronan C-5-epimerase |
| EVM0000842 | MC5E | CG/CHG/CHH | 0         | 353/622(56.75) | 597 | Mannuronan C-5-epimerase |
| EVM0000944 | MC5E | CG/CHG/CHH | 0         | 312/441(70.75) | 651 | Mannuronan C-5-epimerase |
| EVM0009520 | MC5E | CG/CHG/CHH | 7.06E-151 | 183/198(92.42) | 384 | Mannuronan C-5-epimerase |
| EVM0009880 | MC5E | CG/CHG/CHH | 3.63E-106 | 186/301(61.79) | 353 | Mannuronan C-5-epimerase |
| EVM0009972 | MC5E | CG/CHG/CHH | 4.96E-109 | 175/287(60.98) | 347 | Mannuronan C-5-epimerase |
| EVM0010857 | MC5E | CG/CHG/CHH | 9.52E-119 | 226/460(49.13) | 377 | Mannuronan C-5-epimerase |
| EVM0011947 | MC5E | CG/CHG/CHH | 0         | 371/496(74.80) | 773 | Mannuronan C-5-epimerase |
| EVM0012299 | MC5E | CG/CHG/CHH | 2.32E-54  | 123/293(41.98) | 195 | Mannuronan C-5-epimerase |
| EVM0012383 | MC5E | CG/CHG/CHH | 5.18E-123 | 241/488(49.39) | 399 | Mannuronan C-5-epimerase |
| EVM0012837 | MC5E | CG/CHG/CHH | 5.56E-36  | 74/114(64.91)  | 141 | Mannuronan C-5-epimerase |
| EVM0013484 | MC5E | CG/CHG/CHH | 5.19E-15  | 41/92(44.57)   | 79  | Mannuronan C-5-epimerase |
| EVM0014130 | MC5E | CG/CHG/CHH | 0         | 320/497(64.39) | 664 | Mannuronan C-5-epimerase |
| EVM0001093 | MC5E | CG/CHG/CHH | 7.53E-173 | 284/478(59.41) | 531 | Mannuronan C-5-epimerase |
| EVM0001223 | MC5E | CG/CHG/CHH | 6.72E-178 | 249/319(78.06) | 519 | Mannuronan C-5-epimerase |
| EVM0014687 | MC5E | CG/CHG/CHH | 4.11E-12  | 72/208(34.62)  | 76  | Mannuronan C-5-epimerase |
| EVM0014705 | MC5E | CG/CHG/CHH | 0         | 428/487(87.89) | 888 | Mannuronan C-5-epimerase |
| EVM0014790 | MC5E | CG/CHG/CHH | 0         | 310/376(82.45) | 641 | Mannuronan C-5-epimerase |
| EVM0016073 | MC5E | CG/CHG/CHH | 0         | 363/496(73.19) | 734 | Mannuronan C-5-epimerase |
| EVM0016177 | MC5E | CG/CHG/CHH | 0         | 397/498(79.72) | 827 | Mannuronan C-5-epimerase |
| EVM0016581 | MC5E | CG/CHG/CHH | 0         | 367/493(74.44) | 747 | Mannuronan C-5-epimerase |
| EVM0002230 | MC5E | CG/CHG/CHH | 0         | 385/498(77.31) | 807 | Mannuronan C-5-epimerase |
| EVM0002464 | MC5E | CG/CHG/CHH | 6.08E-27  | 53/78(67.95)   | 104 | Mannuronan C-5-epimerase |
| EVM0002592 | MC5E | CG/CHG/CHH | 4.95E-120 | 227/452(50.22) | 372 | Mannuronan C-5-epimerase |
| EVM0003061 | MC5E | CG/CHG/CHH | 0         | 395/497(79.48) | 788 | Mannuronan C-5-epimerase |
| EVM0003920 | MC5E | CG/CHG/CHH | 1.28E-151 | 257/455(56.48) | 473 | Mannuronan C-5-epimerase |

**Table S3.** Summary of the output and quality control of *S. japonica* RNA-seq data.

| Group                 | CK          | T           |
|-----------------------|-------------|-------------|
| Clean Data (bp)       | 7525209400  | 8305414400  |
| High Clean Data (bp)  | 7380026577  | 8163395445  |
| GC (%)                | 0.5822      | 0.5773      |
| Q30 (%)               | 0.9401      | 0.940733333 |
| Clean reads           | 49809940.67 | 54927310.67 |
| High Clean reads      | 49385339.33 | 54014768.67 |
| Total mapped reads    | 43583266.33 | 47711446.33 |
| Total mapped ratio    | 0.882533333 | 0.8835      |
| Sequenced genes       | 19895       | 19653       |
| Sequenced genes ratio | 0.7064      | 0.6978      |
| Total genes           | 28164       |             |

**Table S4.** Summary of up-regulated DEGs in response to the 5-AzaC treatment.

| No. | Gene ID     | log2(FC) | P-Value | Description                                                                                   |
|-----|-------------|----------|---------|-----------------------------------------------------------------------------------------------|
| 1   | GENE_007900 | 2.18     | <0.01   | Ig-like protein                                                                               |
| 2   | GENE_012099 | 10.69    | <0.01   | Uncharacterized protein                                                                       |
| 3   | GENE_028789 | 1.68     | <0.01   | Tyrosine kinase specific for activated (GTP-bound) p21cdc42Hs/<br>leucine rich repeat protein |
| 4   | GENE_026751 | 2.82     | <0.01   | Imm upregulated 3                                                                             |
| 5   | GENE_008258 | 2.57     | <0.01   | Unknown                                                                                       |
| 6   | GENE_012249 | 2.81     | <0.01   | Conserved unknown protein                                                                     |
| 7   | MSTRG.19323 | 3.55     | <0.01   | Tyrosine kinase specific for activated (GTP-bound) p21cdc42Hs/<br>leucine rich repeat protein |
| 8   | GENE_029333 | 1.28     | <0.01   | Tyrosine kinase specific for activated (GTP-bound) p21cdc42Hs/<br>leucine rich repeat protein |
| 9   | MSTRG.10674 | 1.12     | <0.01   | Unknown                                                                                       |
| 10  | GENE_008088 | 3.05     | <0.01   | Unknown                                                                                       |
| 11  | GENE_011250 | 1.29     | <0.01   | PKD domain protein                                                                            |
| 12  | MSTRG.19089 | 1.76     | <0.01   | EsV-1-166                                                                                     |
| 13  | GENE_010808 | 1.39     | <0.01   | Conserved secreted protein                                                                    |
| 14  | GENE_028070 | 1.19     | <0.01   | GDLS-like lipolytic enzyme                                                                    |
| 15  | GENE_008224 | 1.88     | <0.01   | Imm upregulated 3                                                                             |
| 16  | GENE_019563 | 1.03     | <0.01   | Mannuronan C-5-epimerase, partial                                                             |
| 17  | MSTRG.23478 | 1.01     | <0.01   | Unknown                                                                                       |
| 18  | GENE_022151 | 1.75     | <0.01   | Imm upregulated 3                                                                             |
| 19  | GENE_003103 | 1.08     | <0.01   | Ig-like protein, group 2                                                                      |
| 20  | MSTRG.2012  | 6.46     | <0.01   | Calpain-type cysteine protease DEK1                                                           |
| 21  | MSTRG.14567 | 1.91     | <0.01   | EsV-1-166                                                                                     |
| 22  | GENE_020096 | 1.43     | <0.01   | PREDICTED: protein LURP-one-related 10-like                                                   |
| 23  | GENE_017745 | 1.66     | <0.01   | EsV-1-166                                                                                     |
| 24  | MSTRG.18522 | 1.68     | <0.01   | Unknown                                                                                       |
| 25  | MSTRG.9018  | 3.29     | <0.01   | Vanadium-dependent iodoperoxidase 1                                                           |
| 26  | GENE_012016 | 1.49     | <0.01   | Mannuronan C-5-epimerase C-terminal fragment                                                  |
| 27  | GENE_022463 | 4.45     | <0.01   | Unknown                                                                                       |

**Table S5.** Summary of down-regulated DEGs in response to the 5-AzaC treatment.

| No. | Gene ID     | log2(FC) | P-Value | Description                                         |
|-----|-------------|----------|---------|-----------------------------------------------------|
| 1   | GENE_006778 | -1.74    | <0.01   | Pathogenesis-related protein                        |
| 2   | GENE_029319 | -1.16    | <0.01   | Pheromone shutdown, TraB                            |
| 3   | GENE_017013 | -1.32    | <0.01   | Unknown                                             |
| 4   | GENE_022010 | -1.93    | <0.01   | Ankyrin Repeat Transient Receptor Potential Channel |
| 5   | GENE_024372 | -10.76   | <0.01   | Retrovirus-related Pol polyprotein LINE-1           |
| 6   | GENE_016999 | -1.18    | <0.01   | Transporter                                         |
| 7   | GENE_006231 | -1.80    | <0.01   | Adhesin-like protein                                |
| 8   | GENE_003313 | -1.05    | <0.01   | ABC transporter                                     |
| 9   | GENE_024893 | -5.71    | <0.01   | Choline dehydrogenase                               |
| 10  | GENE_003278 | -1.02    | <0.01   | Hypothetical protein Esi_0045_0060                  |
| 11  | GENE_028440 | -2.52    | <0.01   | Vanadium-dependent iodoperoxidase 1                 |
| 12  | GENE_006994 | -6.54    | <0.01   | Expressed unknown protein                           |
| 13  | GENE_012384 | -1.96    | <0.01   | Unknown                                             |

|    |             |       |       |                                               |
|----|-------------|-------|-------|-----------------------------------------------|
| 14 | GENE_001018 | -2.99 | <0.01 | Unknown                                       |
| 15 | GENE_011020 | -1.32 | <0.01 | Carbonic anhydrase                            |
| 16 | GENE_010937 | -1.93 | <0.01 | Polymorphic outer membrane protein            |
| 17 | GENE_024587 | -1.19 | <0.01 | Unsaturated glucuronyl hydrolase, family GH88 |
| 18 | MSTRG.25779 | -2.49 | <0.01 | Calcyphosin-like protein                      |

**Table S6.** Primer used for qRT-PCR. F and R indicate the forward and reverse primers, respectively.

| Gene ID     | Primer         | Primer Sequence           | Product length (bp) |
|-------------|----------------|---------------------------|---------------------|
| GENE_012099 | Forward Primer | ACCTTTCCCTAAAGGCCACG      | 121                 |
|             | Reverse Primer | CTTTGGTCGGTCGTGGGTTA      |                     |
| GENE_026751 | Forward Primer | ATGTACGCGGCACGGATAC       | 251                 |
|             | Reverse Primer | TTGGCTTGAGCTCTACTGGC      |                     |
| MSTRG_19323 | Forward Primer | TACGGACATCGTCTCCACCT      | 435                 |
|             | Reverse Primer | CCGCCCTTACAGGGTTTGAT      |                     |
| GENE_008088 | Forward Primer | CCGACGGGTTTGTGGGATAA      | 359                 |
|             | Reverse Primer | CCCCACTGTACCCCATTTCC      |                     |
| MSTRG_2012  | Forward Primer | GAGATCACCACGAACTCCCC      | 138                 |
|             | Reverse Primer | CAAACCCTTGTTTCGCGAGTC     |                     |
| GENE_024372 | Forward Primer | CGACTCCCGAAACGACTGAT      | 155                 |
|             | Reverse Primer | CCGAAGACACGTCTCTGGTC      |                     |
| GENE_006994 | Forward Primer | CGCTCGATGCCAAAGGTTTT      | 145                 |
|             | Reverse Primer | CCGGTTAAGACACCCTGACC      |                     |
| GENE_024893 | Forward Primer | GCCGTGGTGGATAAGGACTTCAAG  | 85                  |
|             | Reverse Primer | CGGAGGGCGAATAAGGAAAGATGG  |                     |
| EVM0009376  | Forward Primer | GTGGTGGTGGTGGCGTATGTG     | 114                 |
|             | Reverse Primer | CCTCGTACTGCTGCTGATGTTCC   |                     |
| EVM0014652  | Forward Primer | GATGCCGCCAACCATTGAGAG     | 122                 |
|             | Reverse Primer | TTCCGCTCCTCCTCCATCGC      |                     |
| EVM0016386  | Forward Primer | GCCGGATAGCCACTAGACAACAC   | 118                 |
|             | Reverse Primer | GCCAGCGTTATTCTCCGTCGTC    |                     |
| EVM0015676  | Forward Primer | CTCGTCTTCGTCTTCGTCTCTTC   | 106                 |
|             | Reverse Primer | CGCCGTAACCTTCCGAACCAAG    |                     |
| EVM0000169  | Forward Primer | CTGAGGACGAATCGCTTGACTACG  | 132                 |
|             | Reverse Primer | CGGCGGTGTACGAAACTCTTGG    |                     |
| EVM0008300  | Forward Primer | TCACCGCTCAGTCCACCGAAG     | 81                  |
|             | Reverse Primer | CGCTCTCCTGCTCGTCATTAC     |                     |
| EVM0015316  | Forward Primer | AGGAGAGCGGAGACACAATGAGAG  | 95                  |
|             | Reverse Primer | TTCTTGAGAGGGCTTGAGCAATGC  |                     |
| EVM0002335  | Forward Primer | CCTCGTCTACCTCCTCATCAGTCC  | 125                 |
|             | Reverse Primer | CCACCGTCGCCACCAACAAG      |                     |
| EVM0016528  | Forward Primer | GAGCCAACCACTAACCGCAGAG    | 149                 |
|             | Reverse Primer | GCCTTCATCTTGTGTTGACGCTTCG |                     |
| EVM0000188  | Forward Primer | CACAAGAGTTCTACGCCAGGAAGG  | 82                  |
|             | Reverse Primer | ACGCCCCGAGAGCATGAGGAG     |                     |
| EVM0002459  | Forward Primer | ACGGTCAACATCGACGGTTACAC   | 142                 |
|             | Reverse Primer | CATCTCCAAACTCCGTGGCTGAG   |                     |
| EVM0009861  | Forward Primer | CTTCTCGCTGCCTCACGCTTC     | 85                  |

|            |                |                          |     |
|------------|----------------|--------------------------|-----|
|            | Reverse Primer | GCCTCCAATAGCCTTACCACCAAC |     |
| EVM0008139 | Forward Primer | CTGCTAGAATCGTCGTTCCGGAAG | 123 |
|            | Reverse Primer | CAAGTGCTGCGTCTGGTCTCC    |     |
| EVM0007683 | Forward Primer | TGCCGATTGAAGAAGCCAACCTG  | 94  |
|            | Reverse Primer | CACCGTCCCGCATCTTGAACAC   |     |
| EVM0009722 | Forward Primer | CCGTCGCAGTCGATCAAGAACC   | 96  |
|            | Reverse Primer | CATGTTGCCGTCGTCGCTCTC    |     |
| EVM0014993 | Forward Primer | CAACGGCGTGGCTTGGTATCC    | 82  |
|            | Reverse Primer | CAACGGCGTGGCTTGGTATCC    |     |
| EVM0014297 | Forward Primer | CCACGAGACCATTGAGCAGGATTG | 140 |
|            | Reverse Primer | CCAGCAAGTCACGGACGAAGC    |     |
| EVM0016152 | Forward Primer | GCACACTCCCGCTTCGACAC     | 120 |
|            | Reverse Primer | GGCGTACTGTATGCCAACCTCAG  |     |
| EVM0014878 | Forward Primer | CTTGCCGGTCGAGCCATGAAC    | 132 |
|            | Reverse Primer | CCATGTTCCCGTGTCTGTAGG    |     |
| EVM0013496 | Forward Primer | CGGGTCCGTGGCGTATTTCCG    | 128 |
|            | Reverse Primer | CCACCGTCCACATCGCAATCC    |     |
| EVM0009787 | Forward Primer | GGTACGGGAGAGGGTCAGCATC   | 101 |
|            | Reverse Primer | GCATGAGCAGCAAGAGGGAGAAG  |     |
| EVM0006609 | Forward Primer | CTAGCGGCAGCGGGTTTTCC     | 83  |
|            | Reverse Primer | GCGGTTGTGTCTTCCTTCATCTGG |     |
| EVM0007289 | Forward Primer | CGATTGTGCTGCACGGAGACC    | 84  |
|            | Reverse Primer | AATCGGCTCTTCTGGACCTCCTC  |     |
| EVM0009034 | Forward Primer | GAACGCCTCACCACGCTTCG     | 92  |
|            | Reverse Primer | GAACGCCTCACCACGCTTCG     |     |
| EVM0011842 | Forward Primer | CGGCGAAGACGAGAACGATGAC   | 88  |
|            | Reverse Primer | CCCTGCGAGCCTCCGTAGTAG    |     |
| EVM0016415 | Forward Primer | GCCGAGGACGCCCATAAATGTTC  | 150 |
|            | Reverse Primer | GCTTCGCTGTGGTAGTTGGTGTAG |     |

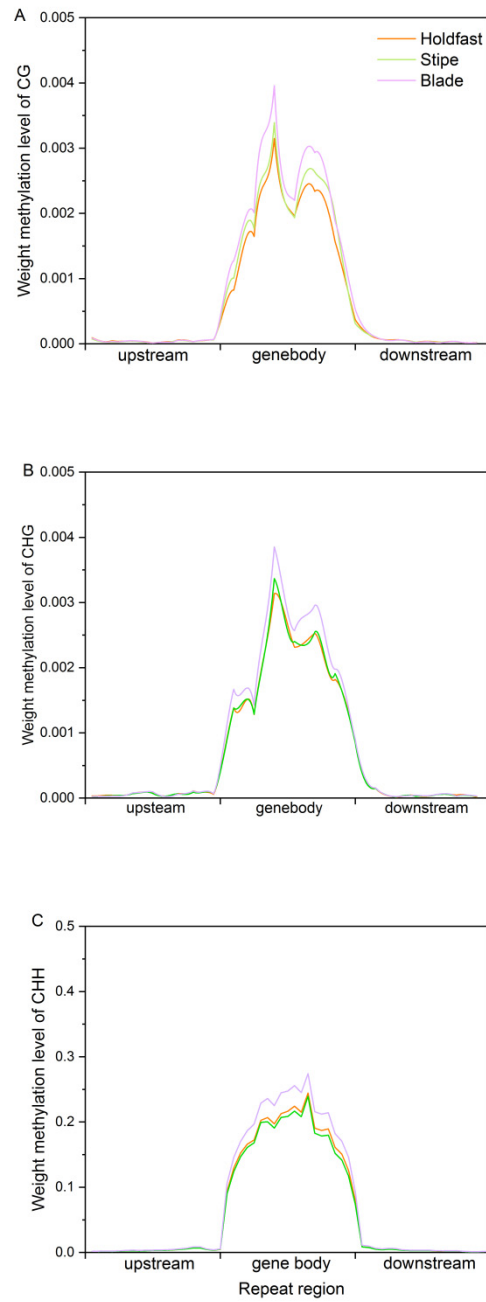

**Figure S1.** Distribution of DNA methylation levels of CG (A), CHG (B) and CHH (C) context across repeat regions in holdfast (navajo white), stipe (light green) and blade (medium orchid) of sporophyte. Repeat regions include upstream, gene body and downstream. Y axis indicates the methylation levels of seven gene features.

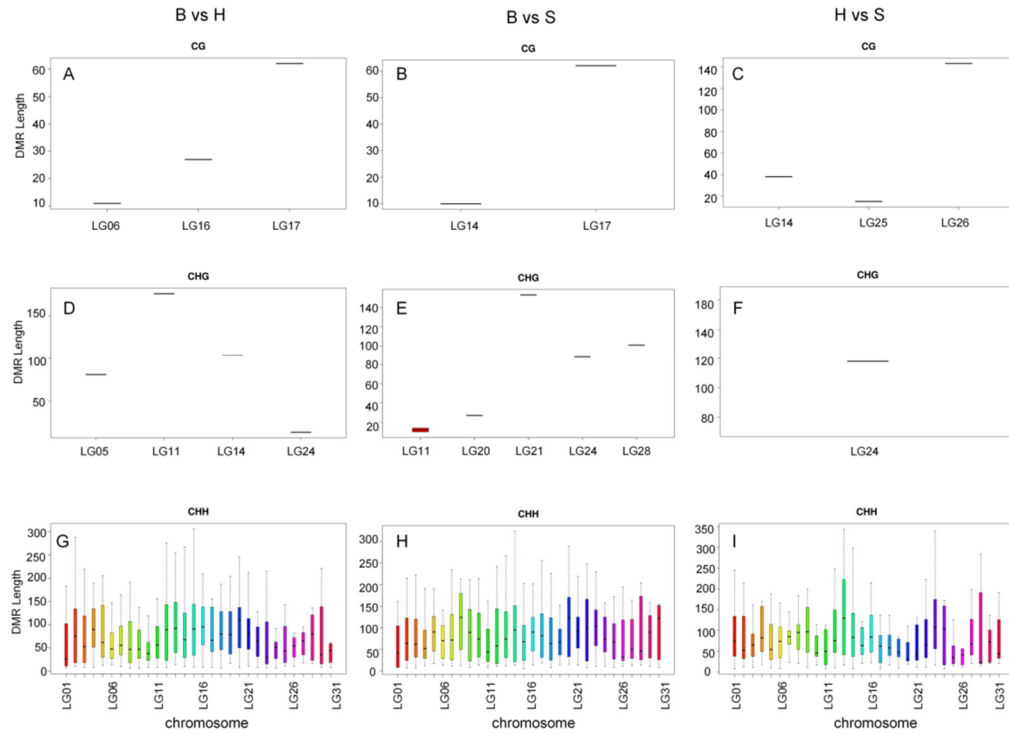

**Figure S2.** Length distribution of DMRs between the holdfast (H), stipe (S) and blade (B) in *S. japonica* sporophytes. Each row represents a different chromosome, and each column represents a different DMR length.

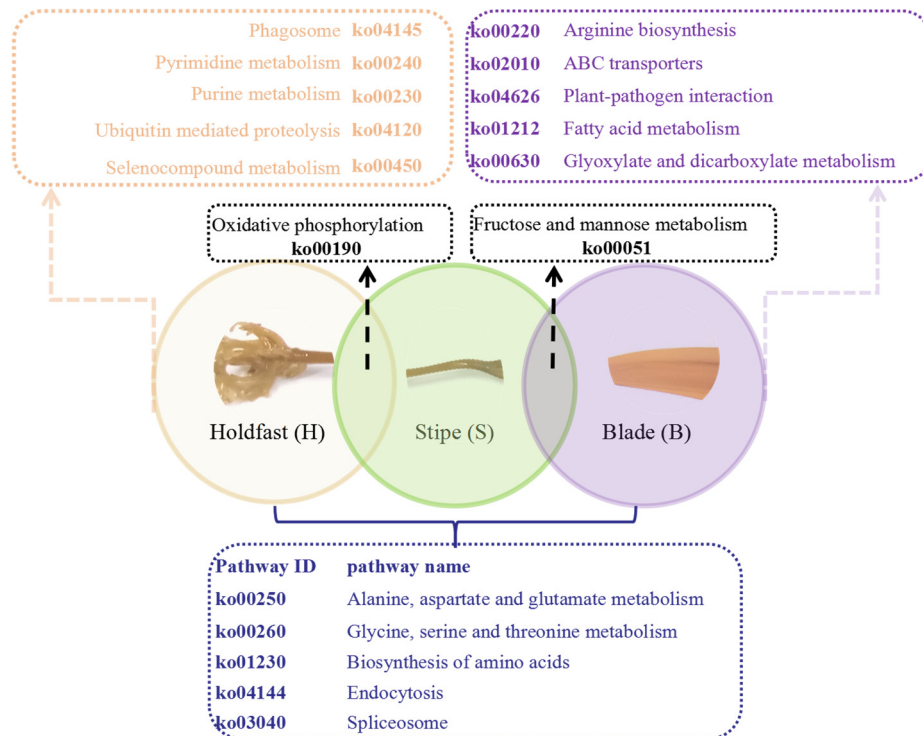

**Figure S3.** Visualization of enriched pathways among holdfast (H), stipe (S) and blade (B) from DMRs. Blue box includes the pathway ID and name enriched in “B vs. H”, “B vs. S” and “H vs. S” groups, which play important roles in sporophyte development. Navajo white box includes the pathway ID and name enriched in the “B vs. H” and “H vs. S” groups, which play important roles in holdfast development. Medium orchid box includes the pathway ID and name enriched in the “B vs. H” and “B vs. S” groups, which play important role in blade development.

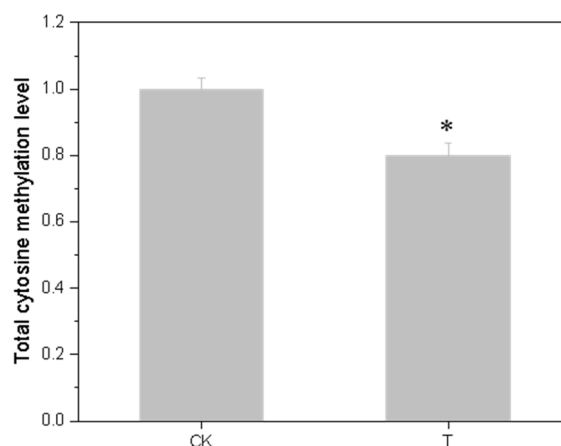

**Figure S4.** Variation of total methylation level to 5-AzaC treatment in *S. japonica* sporophytes. “CK” and “T” represent control group and 75  $\mu$ M 5-AzaC treatment group, respectively. \* indicated significant difference between “CK” and “T” group.

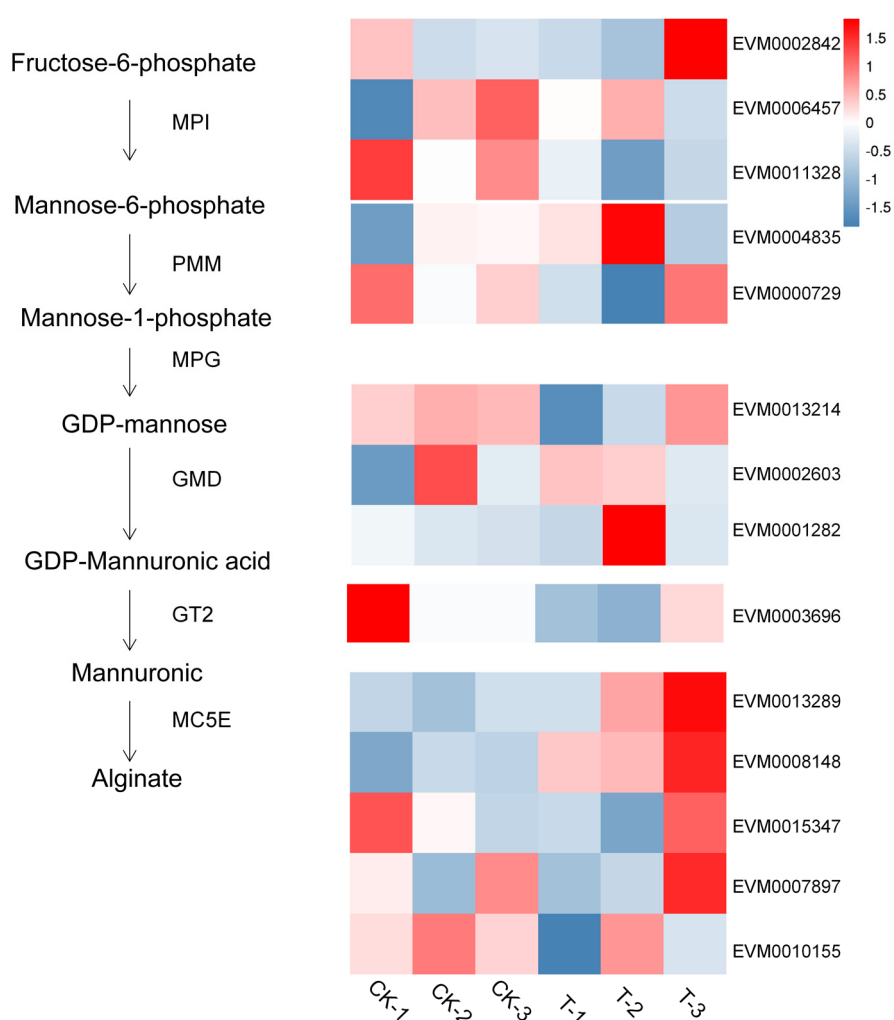

**Figure S5.** Transcriptional patterns of the genes involved in alginate metabolism of sporophyte in response to 5-AzaC treatment. MPI, Mannose-6-phosphate isomerase; PMM, Phosphomannomutase; GMD, GDP-mannose 6-dehydrogenase; GT2, Beta-1,3-glucan synthases (family GT2); MC5E, Mannuronate C5-epimerase. “CK” and “T” represent control group and 75  $\mu$ M 5-AzaC treatment group, respectively.



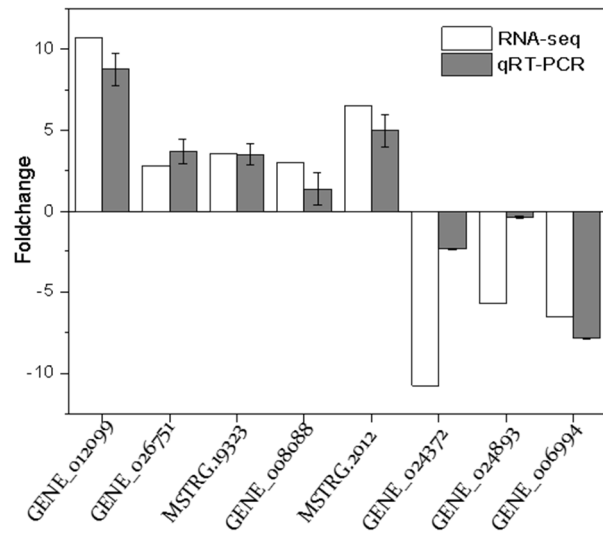

**Figure S6.** Quantitative real-time PCR (qRT-PCR) analysis of differential expression genes in response to 5-AzaC treatment. The white and dark bars represent the gene expression level measured by RNA-seq and qRT-PCR, respectively.

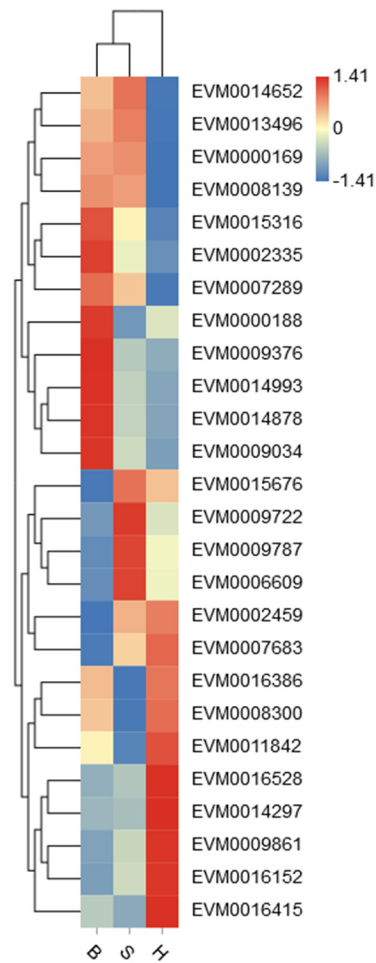

**Figure S7.** Expression patterns of DMR-related genes that located in promoter region among holdfast (H), stipe (S) and blade (B) of sporophyte. Each row represented one gene, and the color gradually changed from blue to red, indicating the shift of gene expression level from low to high.

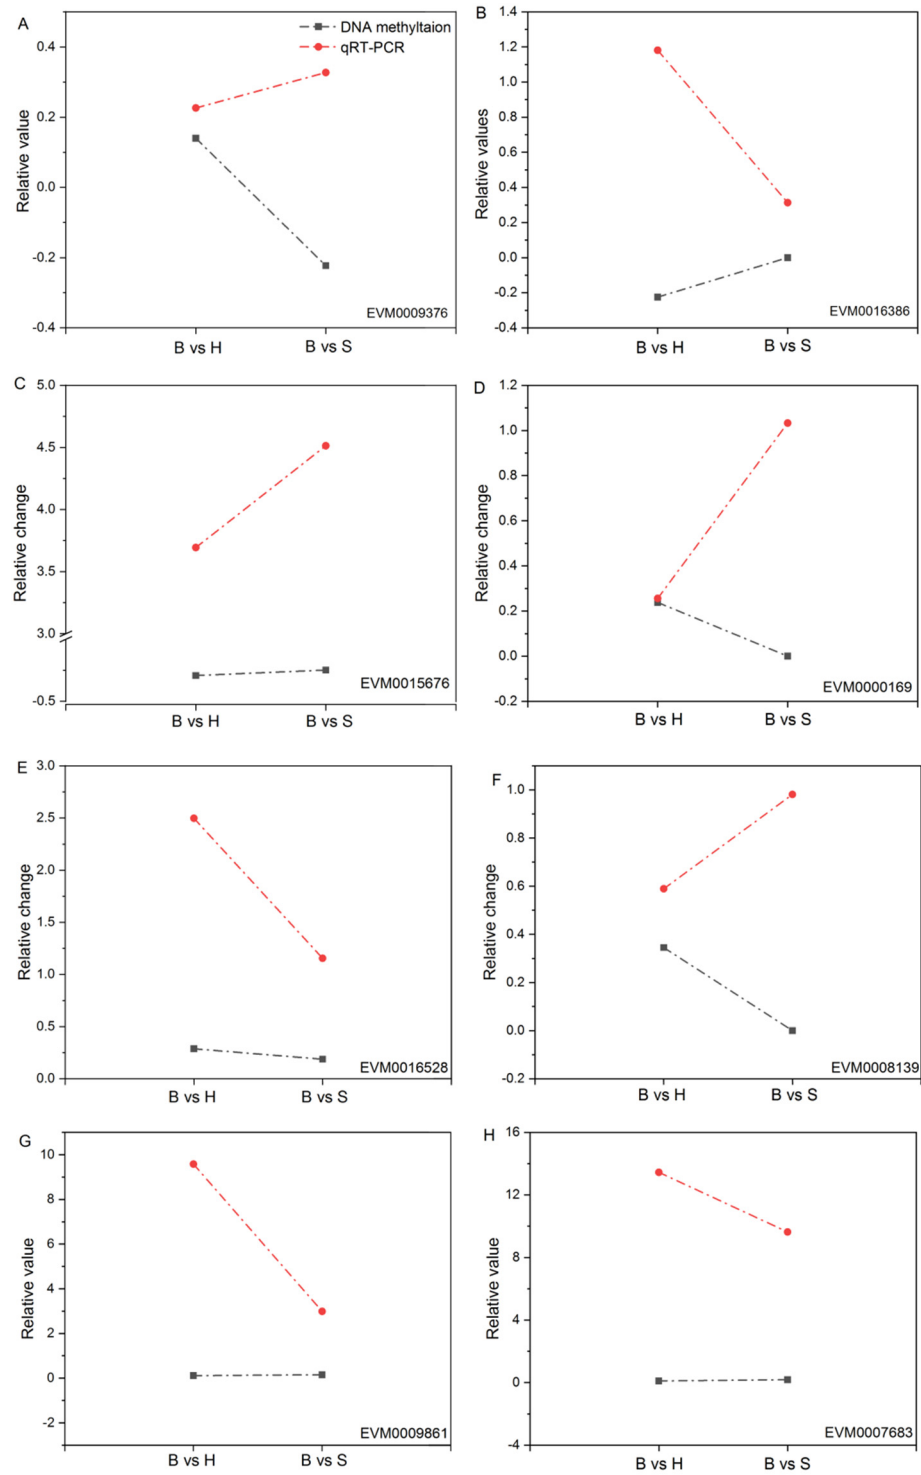

**Figure S8.** The correlation between DNA methylation level and transcript abundance among the "B vs. H", "B vs. S" groups.
